# Supplementary material for: Epidemic outcomes following government responses to COVID-19: Insights from nearly 100,000 models
Source: PubMed Central journal article supplement — Sci Adv. 2024 Jun 5;10(23):eadn0671. doi: 10.1126/sciadv.adn0671 (PMC11152132; doi:10.1126/sciadv.adn0671), 2024-06-05
Supplement: sciadv.adn0671_sm.pdf [file sciadv.adn0671_sm.pdf]

Supplementary Materials for  
**Epidemic outcomes following government responses to COVID-19: Insights  
from nearly 100,000 models**

Eran Bendavid and Chirag J. Patel

Corresponding author: Eran Bendavid, [ebd@stanford.edu](mailto:ebd@stanford.edu)

*Sci. Adv.* **10**, eadn0671 (2024)  
DOI: 10.1126/sciadv.adn0671

**The PDF file includes:**

Fig. S1  
Table S1  
Legend for data file S1  
References

**Other Supplementary Material for this manuscript includes the following:**

Data file S1

**Supplementary Figure S1:** Trends in 4 government responses in the US, South Korea, Sweden, and India, January 1, 2020 to December 31, 2021.

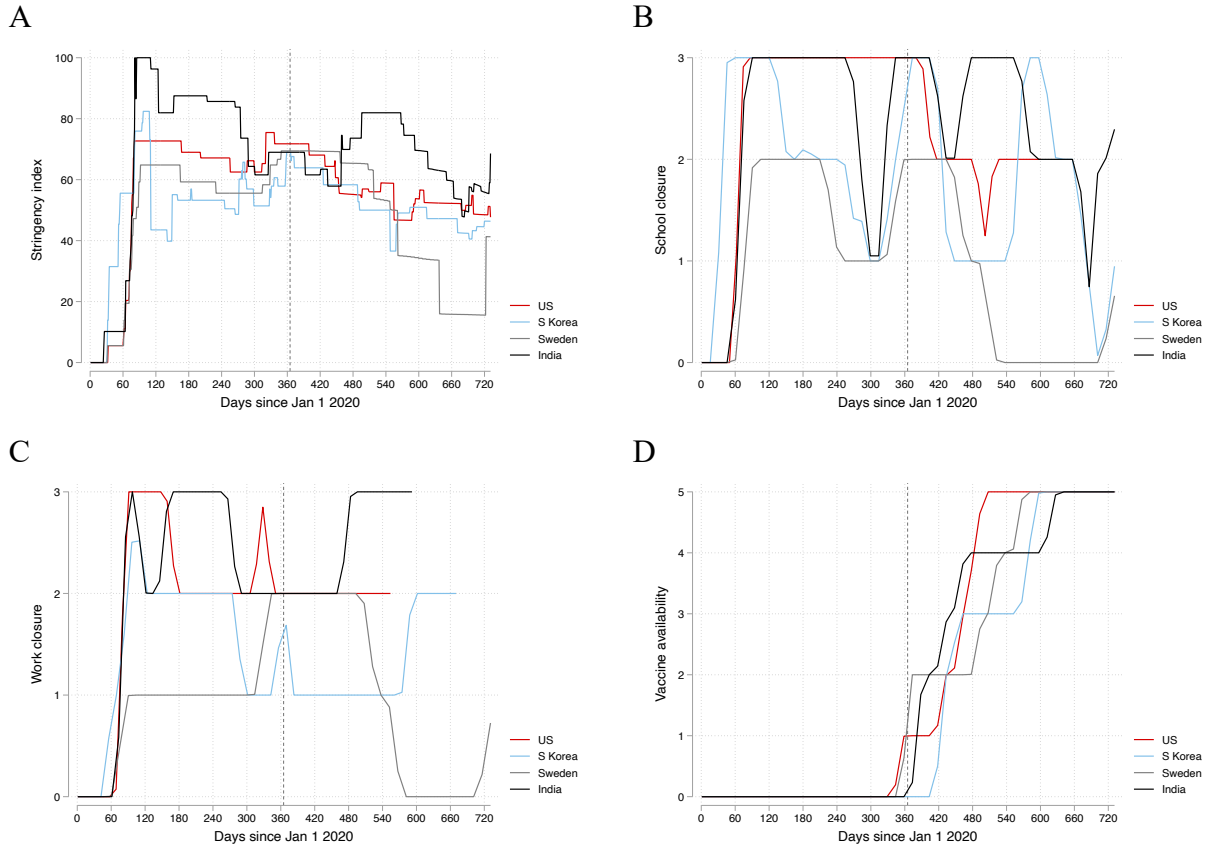

A comparison of government response trends as noted in the Oxford Covid-19 Government Response Tracker (OxCGRT). The definitions of each level of government response and the calculations of the Stringency index are available in the OxCGRT github.

**Supplementary Materials Table S1:** A collection of articles in the scientific literature providing an evaluation of government policy effectiveness on Covid-19. This represents the first 15 articles we could find that directly evaluated government policies. The quoted material represents claims from either the Abstract or Discussion section of the articles. All 15 make strong claims either in the direction of effectiveness or futility of government policies.

| <u>Study/Citation</u>                                                     | <u>Design</u>                 | <u>Period</u> | <u>Geography</u>                                       | <u>Outcomes</u>                 | <u>Conclusion</u>                                                                                                                                                                                                                                                                                                                      | <u>Citations<br/>(as of<br/>1/14/23)</u> |
|---------------------------------------------------------------------------|-------------------------------|---------------|--------------------------------------------------------|---------------------------------|----------------------------------------------------------------------------------------------------------------------------------------------------------------------------------------------------------------------------------------------------------------------------------------------------------------------------------------|------------------------------------------|
| Flaxman et al, Nature 2020 Aug;584(7820):257-261(9)                       | Modeling                      | 2-5/2020      | 11 European countries                                  | Transmission                    | "Our results show that major non-pharmaceutical interventions—and lockdowns in particular—have had a large effect on reducing transmission."                                                                                                                                                                                           | 3736                                     |
| Hsiang et al, Nature 2020 584, 262–267(15)                                | Observational                 | 2-4/2020      | Regions in China, South Korea, Italy, Iran, France, US | Transmission / case growth rate | "We estimate that across these 6 countries, interventions prevented or delayed on the order of 61 million confirmed cases, corresponding to averting approximately 495 million total infections."                                                                                                                                      | 1571                                     |
| Herby et al, medRxiv 2023.08.30.23294845(11)                              | Observational (meta-analysis) | 1-9/2020      | US, Europe (countries/continental); Italy              | Mortality                       | "... lockdown policies are ill-founded and should be rejected as a pandemic policy instrument"                                                                                                                                                                                                                                         | 165                                      |
| Krishnamachari et al, Am J Infect Control. 2021 Aug; 49(8): 1036–1042(43) | Observational                 | 2020-2021     | United States                                          | Cases                           | "The benefits of mask mandates are apparent, especially when mandates were issued within a month."                                                                                                                                                                                                                                     | 35                                       |
| Dreher et al, Am J Med Sci 2021;361:575-84 (44)                           | Observational                 | 1-5/2020      | United States                                          | Transmission, deaths            | "States with stay-at-home orders in place at the time of their 500th case were associated with lower average Rt the following week compared to states without them (p<0.001) and significantly less likely to have an Rt>1 (OR 0.07, 95% CI 0.01–0.37, p = 0.004)...Stay-at-home orders had the largest effect of any policy analyzed" | 57                                       |
| Hale et al, medRxiv                                                       | Observational                 | 1-5/2020      | 170 countries in Europe, Asia,                         | Mortality                       | "...speed and degree of government responses do indeed have a statistically robust and substantively                                                                                                                                                                                                                                   | 45                                       |

|                                                                          |                            |                 |                     |                                |                                                                                                                                                                                                                                                                                                                                                                                                   |     |
|--------------------------------------------------------------------------|----------------------------|-----------------|---------------------|--------------------------------|---------------------------------------------------------------------------------------------------------------------------------------------------------------------------------------------------------------------------------------------------------------------------------------------------------------------------------------------------------------------------------------------------|-----|
| 2020.07.04.20145334(22)                                                  |                            |                 | Americas and Africa |                                | significant relationship with deaths related to COVID-19"                                                                                                                                                                                                                                                                                                                                         |     |
| Tobias, Sci Total Environ 2020;725:138539(45)                            | Observational              | 2-4/2020        | Spain and Italy     | Mortality                      | "Lockdown, including restricted social contact and keeping open only those businesses essential to the country's supply chains, has had a beneficial effect in both countries."                                                                                                                                                                                                                   | 324 |
| Vlachos et al. Proc Natl Acad Sci. 2021 Mar 2;118(9)(46)                 | Observational              | 3-4/2020        | Sweden              | Cases                          | "The results for parents indicate that keeping lower-secondary schools open had minor consequences for the overall transmission of SARS-CoV-2 in society."                                                                                                                                                                                                                                        | 133 |
| Gibson. New Zealand Economic Papers, 56:1, 17-28, 2020(47)               | Observational              | 3-5/2020        | US                  | Mortality                      | "Lockdowns are ineffective at reducing Covid-19 deaths. Variation amongst counties in the United States, where over one-fifth had no lockdown, shows no impact from lockdowns. Specifically, one cannot reject the hypothesis of zero difference in deaths between lockdown and non-lockdown counties, even after three months. Thus, there is no evidence to suggest that lockdowns saved lives" | 47  |
| Siedner et al, PLoS Medicine. 17.8 (2020): e1003244. August 11, 2020(48) | Observational before-after | up to 5/26/2020 | US                  | Case and mortality growth rate | "Statewide social distancing measures were associated with a decrease in the COVID-19 case growth rate that was statistically significant. Statewide social distancing measures were also associated with a decrease in the COVID-19-attributed mortality growth rate beginning 7 days after implementation, although this decrease was no longer statistically significant by 10 days."          | 158 |
| Liu et al, BMC Public Health 21, 965 (2021)(49)                          | Observational              | Up to 5/31/2020 | US                  | Reproduction number            | "This retrospective assessment of NPIs on Rt has shown that NPIs played critical roles on epidemic control in the US in the past several months. The quantitative results could guide individualized decision making for future adjustment of NPIs in the US and other countries for COVID-19 and other similar infectious diseases."                                                             | 36  |
| Alfano et al. Appl Health Econ Health Policy                             | Observational panel data   | Up to 5/10/2020 | 202 countries       | Cases and reproduction number  | "Results suggest that lockdown is effective in reducing the R0, i.e. the number of people infected by each infected person, and that, unlike what has been                                                                                                                                                                                                                                        | 495 |

|                                                                |                                       |                   |               |                               |                                                                                                                                                                                                                                                                                                                                                                                                                 |     |
|----------------------------------------------------------------|---------------------------------------|-------------------|---------------|-------------------------------|-----------------------------------------------------------------------------------------------------------------------------------------------------------------------------------------------------------------------------------------------------------------------------------------------------------------------------------------------------------------------------------------------------------------|-----|
| 2020;18:509-17(50)                                             |                                       |                   |               |                               | suggested in previous analyses, its efficacy continues to hold 20 days after the introduction of the policy"                                                                                                                                                                                                                                                                                                    |     |
| Thayer et al, Health Policy Plan. 2021 Jun 3;36(5):620-629(51) | Observational interrupted time series | Up to 8/31/2020   | India         | Cases                         | "The increasing rate of incident case reports in India was attenuated after the lockdown policy was implemented compared to before, and this reduction was maintained after the restrictions were eased, suggesting that the policy helped to 'flatten the curve' and buy additional time for pandemic preparedness, response and recovery"                                                                     | 58  |
| Guzzetta et al, Emerg Infect Dis. 2021 Jan;27(1):267-270(52)   | Observational                         | Up to May 3, 2020 | Italy         | Cases and reproduction number | "Our results suggest that the national lockdown put in place as of March 11 to limit the spread of SARS-CoV-2 in Italy brought Rt below 1 in most regions and provinces within 2 weeks. Although Rt had been declining steeply even before the national lockdown in regions with intense interventions, we estimated that the epidemic was brought under control only after the implementation of the lockdown" | 80  |
| Liu et al, BMC Med. 2021 Feb 5;19(1):40(53)                    | Observational panel                   | Up to June 2020   | 130 countries | Transmission, cases           | "The effectiveness of school closure and internal movement restrictions appears robust across different model specifications, with some evidence that other NPIs may also be effective under particular conditions. This provides empirical evidence for the potential effectiveness of many, although not all, actions policy-makers are taking to respond to the COVID-19 pandemic."                          | 328 |

**Supplementary Data S1:** This folder contains the code for all analyses and figures. The code is written in Stata 17. The code is executed by running the *master\_file*. The *master\_file* takes the original data files from OxCGRT, the Johns Hopkins Covid-19 dashboard, Covid-19 cases, infections, and deaths from the Institute for Health Metrics and Evaluation (IHME), and excess all-cause mortality from the *New York Times*, the *Financial Times*, the *Economist*, and the World Mortality Dataset from a folder titled *data*, and returns the results in a folder titled *results*.

## REFERENCES AND NOTES

1. N. A. Christakis, *Apollo's Arrow: The Profound and Enduring Impact of Coronavirus on the Way We Live* (Little, Brown and Company, 2020).
2. A. A. Rabaan, S. H. Al-Ahmed, S. Haque, R. Sah, R. Tiwari, Y. S. Malik, K. Dhama, M. I. Yattoo, D. K. Bonilla-Aldana, A. J. Rodriguez-Morales, SARS-CoV-2, SARS-CoV, and MERS-COV: A comparative overview. *Infez. Med.* **28**, 174–184 (2020).
3. United Nations Department of Economic and Social Affairs, Population Division. World Population Prospects 2022: Summary of Results (United Nations Department of Economic and Social Affairs, 2022); [www.un.org/development/desa/pd/content/World-Population-Prospects-2022](http://www.un.org/development/desa/pd/content/World-Population-Prospects-2022).
4. T. Hale, N. Angrist, R. Goldszmidt, B. Kira, A. Petherick, T. Phillips, S. Webster, E. Cameron-Blake, L. Hallas, S. Majumdar, H. Tatlow, A global panel database of pandemic policies (Oxford COVID-19 Government Response Tracker). *Nat. Hum. Behav.* **5**, 529–538 (2021).
5. T. Hale, N. Angrist, B. Kira, A. Petherick, T. Phillips, S. Webster, Variation in government responses to COVID-19, Blavatnik School of Government working paper (2023); <https://ora.ox.ac.uk/objects/uuid:0ab73a02-ca18-4e1f-a41b-cfee2d30e81>.
6. R. J. Hatchett, C. E. Mecher, M. Lipsitch, Public health interventions and epidemic intensity during the 1918 influenza pandemic. *Proc. Natl. Acad. Sci. U.S.A.* **104**, 7582–7587 (2007).
7. Political Declaration on HIV and AIDS: On the Fast Track to Accelerating the Fight against HIV and to Ending the AIDS Epidemic by 2030, [www.unaids.org/en/resources/documents/2016/2016-political-declaration-HIV-AIDS](http://www.unaids.org/en/resources/documents/2016/2016-political-declaration-HIV-AIDS).
8. Report 9 - Impact of Non-Pharmaceutical Interventions (NPIs) to Reduce COVID-19 Mortality and Healthcare Demand, Imperial College London, <https://www.imperial.ac.uk/mrc-global-infectious-disease-analysis/disease-areas/covid-19/report-9-impact-of-npis-on-covid-19/>.

9. S. Flaxman, S. Mishra, A. Gandy, H. J. T. Unwin, T. A. Mellan, H. Coupland, C. Whittaker, H. Zhu, T. Berah, J. W. Eaton, M. Monod, A. C. Ghani, C. A. Donnelly, S. Riley, M. A. C. Vollmer, N. M. Ferguson, L. C. Okell, S. Bhatt, Estimating the effects of non-pharmaceutical interventions on COVID-19 in Europe. *Nature* **584**, 257–261 (2020).
10. D. H. P. Balog-Way, K. A. McComas, COVID-19: Reflections on trust, tradeoffs, and preparedness. *J. Risk Res.* **23**, 838–848 (2020).
11. J. Herby, L. Jonung, S. H. Hanke, A literature review and meta-analysis of the effects of lockdowns on COVID-19 mortality, in *Studies in Applied Economics 200* (The Johns Hopkins Institute for Applied Economics, Global Health, and the Study of Business Enterprise).
12. S. Talic, S. Shah, H. Wild, D. Gasevic, A. Maharaj, Z. Ademi, X. Li, W. Xu, I. Mesa-Eguiagaray, J. Rostron, E. Theodoratou, X. Zhang, A. Motee, D. Liew, D. Ilic, Effectiveness of public health measures in reducing the incidence of covid-19, SARS-CoV-2 transmission, and covid-19 mortality: Systematic review and meta-analysis. *BMJ* **375**, e068302 (2021).
13. E. Bendavid, B. Mulaney, N. Sood, S. Shah, R. Bromley-Dulfano, C. Lai, Z. Weissberg, R. Saavedra-Walker, J. Tedrow, A. Bogan, T. Kupiec, D. Eichner, R. Gupta, J. P. A. Ioannidis, J. Bhattacharya, COVID-19 antibody seroprevalence in Santa Clara County, California. *Int. J. Epidemiol.* **50**, 410–419 (2021).
14. A. Atkeson, K. Kopecky, T. Zha, “Four stylized facts about COVID-19” (Working Paper 27719, National Bureau of Economic Research, 2020); <https://doi.org/10.3386/w27719>.
15. S. Hsiang, D. Allen, S. Annan-Phan, K. Bell, I. Bolliger, T. Chong, H. Druckenmiller, L. Y. Huang, A. Hultgren, E. Krasovich, P. Lau, J. Lee, E. Rolf, J. Tseng, T. Wu, The effect of large-scale anti-contagion policies on the COVID-19 pandemic. *Nature* **584**, 262–267 (2020).
16. P. Bagus, J. A. Peña-Ramos, A. Sánchez-Bayón, COVID-19 and the Political Economy of Mass Hysteria. *Int. J. Environ. Res. Public Health* **18**, 1376 (2021).
17. T. J. Bollyky, E. Castro, A. Y. Aravkin, K. Bhangdia, J. Dalos, E. N. Hulland, S. Kiernan, A. Lastuka, T. A. McHugh, S. M. Ostroff, P. Zheng, H. T. Chaudhry, E. Ruggiero, I. Turilli, C.



Adolph, J. O. Amlag, B. Bang-Jensen, R. M. Barber, A. Carter, C. Chang, R. M. Cogen, J. K. Collins, X. Dai, W. J. Dangel, C. Dapper, A. Deen, A. Eastus, M. Erickson, T. Fedosseeva, A. D. Flaxman, N. Fullman, J. R. Giles, G. Guo, S. I. Hay, J. He, M. Helak, B. M. Huntley, V. C. Iannucci, K. E. Kinzel, K. E. LeGrand, B. Magistro, A. H. Mokdad, H. Nassereldine, Y. Ozten, M. Pasovic, D. M. Pigott, R. C. Reiner, G. Reinke, A. E. Schumacher, E. Serieux, E. E. Spurlock, C. E. Troeger, A. T. Vo, T. Vos, R. Walcott, S. Yazdani, C. J. L. Murray, J. L. Dieleman, Assessing COVID-19 pandemic policies and behaviours and their economic and educational trade-offs across US states from Jan 1, 2020, to July 31, 2022: An observational analysis. *Lancet* **401**, 1341–1360 (2023).

18. S. Steegen, F. Tuerlinckx, A. Gelman, W. Vanpaemel, Increasing Transparency Through a Multiverse Analysis. *Perspect Psychol Sci* **11**, 702–712 (2016).
19. J. A. Harder, The multiverse of methods: Extending the multiverse analysis to address data-collection decisions. *Perspect. Psychol. Sci.* **15**, 1158–1177 (2020).
20. X. Sala-I-Martin, I just ran two million regressions. *Am. Econ. Rev.* **87**, 178–183 (1997).
21. C. J. Patel, B. Burford, J. P. Ioannidis, Assessment of vibration of effects due to model specification can demonstrate the instability of observational associations. *J. Clin. Epidemiol.* **68**, 1046–1058 (2015).
22. T. Hale, A. J. Hale, B. Kira, A. Petherick, T. Phillips, D. Sridhar, R. N. Thompson, S. Webster, N. Angrist, Global assessment of the relationship between government response measures and COVID-19 deaths. medRxiv 2020.07.04.20145334 (2020).  
<https://doi.org/10.1101/2020.07.04.20145334>.
23. Y. Benjamini, D. Yekutieli, The control of the false discovery rate in multiple testing under dependency. *Ann. Stat.* **29**, 1165–1188 (2001).
24. H. N. Altarawneh, H. Chemaitelly, H. H. Ayoub, P. Tang, M. R. Hasan, H. M. Yassine, H. A. Al-Khatib, M. K. Smatti, P. Coyle, Z. Al-Kanaani, E. Al-Kuwari, A. Jeremijenko, A. H. Kaleeckal, A. N. Latif, R. M. Shaik, H. F. Abdul-Rahim, G. K. Nasrallah, M. G. Al-Kuwari, A.

- A. Butt, H. E. Al-Romaihi, M. H. Al-Thani, A. Al-Khal, R. Bertollini, L. J. Abu-Raddad, Effects of previous infection and vaccination on symptomatic Omicron infections. *N. Engl. J. Med.* **387**, 21–34 (2022).
25. Y. Goldberg, M. Mandel, Y. M. Bar-On, O. Bodenheimer, L. Freedman, E. J. Haas, R. Milo, S. Alroy-Preis, N. Ash, A. Huppert, Waning immunity after the BNT162b2 vaccine in Israel. *N. Engl. J. Med.* **385**, e85 (2021).
26. F. Naudet, C. J. Patel, N. J. DeVito, G. L. Goff, I. A. Cristea, A. Braillon, S. Hoffmann, Improving the transparency and reliability of observational studies through registration. *BMJ* **384**, e076123 (2024).
27. S. L. Myers, Is spreading medical misinformation a doctor’s free speech right? *The New York Times*, 30 November 2022. [www.nytimes.com/2022/11/30/technology/medical-misinformation-covid-free-speech.html](http://www.nytimes.com/2022/11/30/technology/medical-misinformation-covid-free-speech.html).
28. P. S. Hart, S. Chinn, S. Soroka, Politicization and polarization in COVID-19 News coverage. *Sci. Commun.* **42**, 679–697 (2020).
29. E. Dong, H. Du, L. Gardner, An interactive web-based dashboard to track COVID-19 in real time. *Lancet Infect. Dis.* **20**, 533–534 (2020).
30. COVID-19 estimate downloads, *Institute for Health Metrics and Evaluation* (2020); [www.healthdata.org/covid/data-downloads](http://www.healthdata.org/covid/data-downloads).
31. R. C. Reiner, R. M. Barber, J. K. Collins, P. Zheng, C. Adolph, J. Albright, C. M. Antony, A. Y. Aravkin, S. D. Bachmeier, B. Bang-Jensen, M. S. Bannick, S. Bloom, A. Carter, E. Castro, K. Causey, S. Chakrabarti, F. J. Charlson, R. M. Cogen, E. Combs, X. Dai, W. J. Dangel, L. Earl, S. B. Ewald, M. Ezalarab, A. J. Ferrari, A. Flaxman, J. J. Frostad, N. Fullman, E. Gakidou, J. Gallagher, S. D. Glenn, E. A. Goosmann, J. He, N. J. Henry, E. N. Hulland, B. Hurst, C. Johanns, P. J. Kendrick, A. Khemani, S. L. Larson, A. Lazzar-Atwood, K. E. LeGrand, H. Lescinsky, A. Lindstrom, E. Linebarger, R. Lozano, R. Ma, J. Månsson, B. Magistro, A. M. M. Herrera, L. B. Marczak, M. K. Miller-Petrie, A. H. Mokdad, J. D. Morgan, P. Naik, C. M. Odell,

- J. K. O'Halloran, A. E. Osgood-Zimmerman, S. M. Ostroff, M. Pasovic, L. Penberthy, G. Phipps, D. M. Pigott, I. Pollock, R. E. Ramshaw, S. B. Redford, G. Reinke, S. Rolfe, D. F. Santomauro, J. R. Shackleton, D. H. Shaw, B. S. Sheena, A. Sholokhov, R. J. D. Sorensen, G. Sparks, E. E. Spurlock, M. L. Subart, R. Syailendrawati, A. E. Torre, C. E. Troeger, T. Vos, A. Watson, S. Watson, K. E. Wiens, L. Woyczynski, L. Xu, J. Zhang, S. I. Hay, S. S. Lim, C. J. L. Murray, IHME COVID-19 FORECASTING TEAM, MODELING COVID-19 scenarios for the United States. *Nat. Med.* **27**, 94–105 (2021).
32. A. Karlinsky, D. Kobak, Tracking excess mortality across countries during the COVID-19 pandemic with the World Mortality Dataset. *eLife* **10**, e69336 (2021).
33. covid-19-excess-deaths nytimes github, *GitHub* (2023); <https://github.com/nytimes/covid-19-data>.
34. covid-19-excess-deaths Financial-Times github, *GitHub* (2022); <https://github.com/Financial-Times/coronavirus-excess-mortality-data>.
35. covid-19-excess-deaths The Economist github, *GitHub* (2023); <https://github.com/TheEconomist/covid-19-excess-deaths-tracker>.
36. M. Levitt, F. Zonta, J. P. A. Ioannidis, Comparison of pandemic excess mortality in 2020–2021 across different empirical calculations. *Environ. Res.* **213**, 113754 (2022).
37. J. A. Lewnard, N. C. Lo, Scientific and ethical basis for social-distancing interventions against COVID-19. *Lancet Infect. Dis.* **20**, 631–633 (2020).
38. M. E. Wharton, Measles elimination in the United States. *J Infect Dis* **189**, S1–S3 (2004).
39. A. B. Bloch, W. A. Orenstein, H. C. Stetler, S. G. Wassilak, R. W. Amler, K. J. Bart, C. D. Kirby, A. R. Hinman, Health impact of measles vaccination in the United States. *Pediatrics* **76**, 524–532 (1985).
40. D. J. Sencer, H. B. Dull, A. D. Langmuir, Epidemiologic basis for eradication of measles in 1967. *Public Health Rep.* **82**, 253–256 (1967).

41. Reported cases and deaths of measles, *Our World in Data*;  
<https://ourworldindata.org/grapher/measles-cases-and-death>.
42. Centers for Disease Control and Prevention, MMWR Summary of Notifiable Diseases, United States (Centers for Disease Control and Prevention, 1993);  
[www.cdc.gov/mmwr/preview/mmwrhtml/00035381.htm](http://www.cdc.gov/mmwr/preview/mmwrhtml/00035381.htm).
43. B. Krishnamachari, A. Morris, D. Zastrow, A. Dsida, B. Harper, A. J. Santella, The role of mask mandates, stay at home orders and school closure in curbing the COVID-19 pandemic prior to vaccination. *Am. J. Infect. Control* **49**, 1036–1042 (2021).
44. N. Dreher, Z. Spiera, F. M. McAuley, L. Kuohn, J. R. Durbin, N. F. Marayati, M. Ali, A. Y. Li, T. C. Hannah, A. Gometz, J. Kostman, T. F. Choudhri, Policy interventions, social distancing, and SARS-CoV-2 transmission in the united states: A retrospective state-level analysis. *Am. J. Med. Sci.* **361**, 575–584 (2021).
45. A. Tobías, Evaluation of the lockdowns for the SARS-CoV-2 epidemic in Italy and Spain after one month follow up. *Sci. Total Environ.* **725**, 138539 (2020).
46. J. Vlachos, E. Hertegård, H. B. Svaleryd, The effects of school closures on SARS-CoV-2 among parents and teachers. *Proc. Natl. Acad. Sci. U.S.A.* **118**, e2020834118 (2021).
47. J. Gibson, Government mandated lockdowns do not reduce Covid-19 deaths: Implications for evaluating the stringent New Zealand response. *New Zealand Economic Papers* **56**, 17–28 (2022).
48. M. J. Siedner, G. Harling, Z. Reynolds, R. F. Gilbert, S. Haneuse, A. S. Venkataramani, A. C. Tsai, Social distancing to slow the US COVID-19 epidemic: Longitudinal pretest–posttest comparison group study. *PLoS Med.* **17**, e1003244 (2020).
49. X. Liu, X. Xu, G. Li, X. Xu, Y. Sun, F. Wang, X. Shi, X. Li, G. Xie, L. Zhang, Differential impact of non-pharmaceutical public health interventions on COVID-19 epidemics in the United States. *BMC Public Health* **21**, 965 (2021).

50. V. Alfano, S. Ercolano, The efficacy of lockdown against COVID-19: A cross-country panel analysis. *Appl. Health Econ. Health Policy* **18**, 509–517 (2020).
51. W. M. Thayer, M. Z. Hasan, P. Sankhla, S. Gupta, An interrupted time series analysis of the lockdown policies in India: A national-level analysis of COVID-19 incidence. *Health Policy Plan.* **36**, 620–629 (2021).
52. G. Guzzetta, F. Riccardo, V. Marziano, P. Poletti, F. Trentini, A. Bella, X. Andrianou, M. Del Manso, M. Fabiani, S. Bellino, S. Boros, A. M. Urdiales, M. F. Vescio, A. Piccioli, COVID-19 Working Group 2, S. Brusaferrero, G. Rezza, P. Pezzotti, M. Ajelli, S. Merler, Impact of a nationwide lockdown on SARS-CoV-2 transmissibility, Italy. *Emerg. Infect. Dis.* **27**, 267–270 (2021).
53. Y. Liu, C. Morgenstern, J. Kelly, R. Lowe, J. Munday, C. J. Villabona-Arenas, H. Gibbs, C. A. B. Pearson, K. Prem, Q. J. Leclerc, S. R. Meakin, W. J. Edmunds, C. I. Jarvis, A. Gimma, S. Funk, M. Quaife, T. W. Russell, J. C. Emory, S. Abbott, J. Hellewell, D. C. Tully, R. M. G. J. Houben, K. O'Reilly, G. R. Gore-Langton, A. J. Kucharski, M. Auzenbergs, B. J. Quilty, T. Jombart, A. Rosello, O. Brady, K. E. Atkins, K. van Zandvoort, J. W. Rudge, A. Endo, K. Abbas, F. Y. Sun, S. R. Procter, S. Clifford, A. M. Foss, N. G. Davies, Y.-W. D. Chan, C. Diamond, R. C. Barnard, R. M. Eggo, A. K. Deol, E. S. Nightingale, D. Simons, K. Sherratt, G. Medley, S. Hué, G. M. Knight, S. Flasche, N. I. Bosse, P. Klepac, M. Jit, The impact of non-pharmaceutical interventions on SARS-CoV-2 transmission across 130 countries and territories. *BMC Med.* **19**, 40 (2021).
